# Supplementary material for: A Novel Forest EcoSpatial Network for Carbon Stocking Using Complex Network Theory in the Yellow River Basin
Source: MDPI journal article supplement (doi:10.3390/rs15102612), 2023-05-17
Supplement: s1 [file s1]

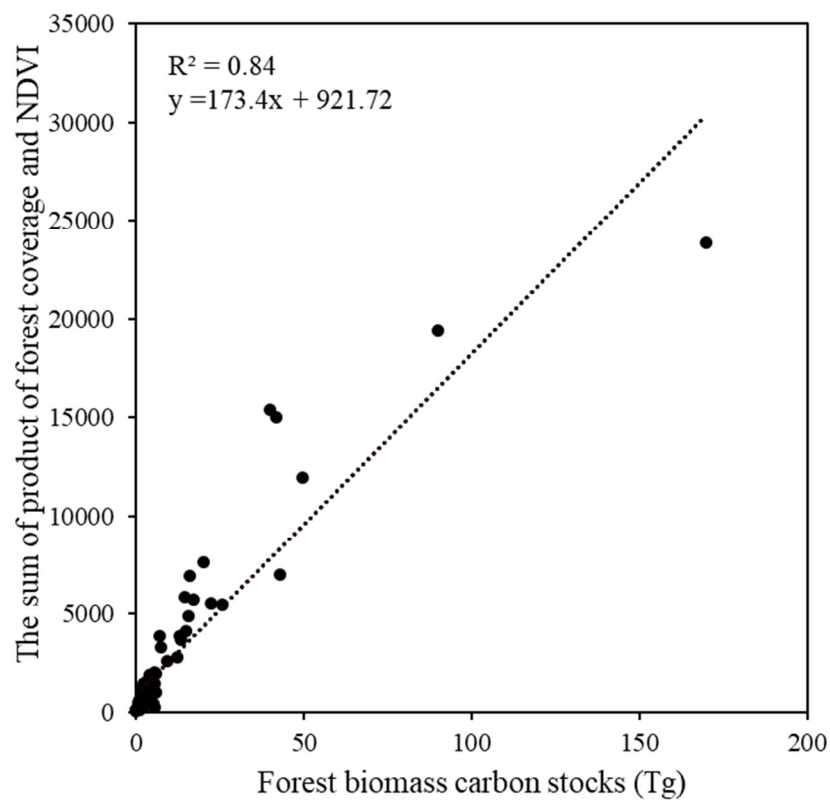

Figure S1: Relationship between the sum of the product of the forest coverage and NDVI and forest biomass C stocks at the city scale.
